# Supplementary material
Source: PubMed Central journal article supplement (PMC5318141)

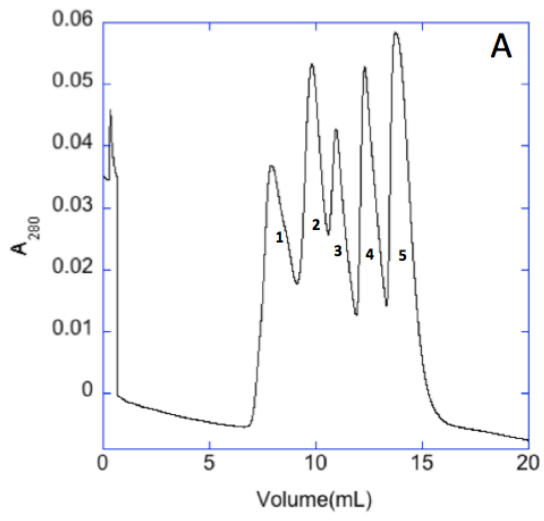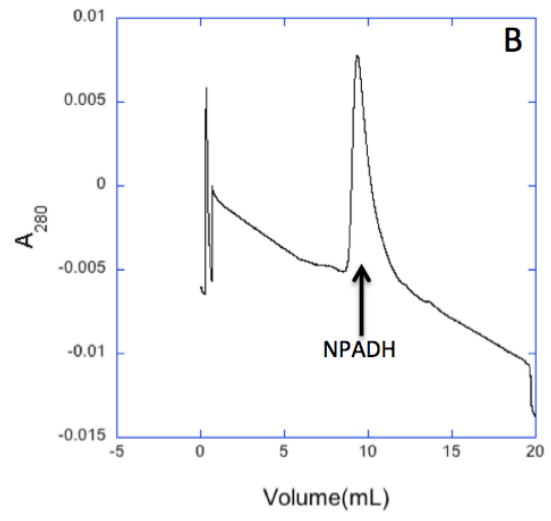

Supplement: NIHMS849733-supplement-2.pdf [file NIHMS849733-supplement-2.pdf]
